# Supplementary material for: Environmental Factors Driving Spatial Heterogeneity in Desert Halophile Microbial Communities
Source: Front Microbiol. 2020 Oct 20;11:578669. doi: 10.3389/fmicb.2020.578669 (PMC7606970; doi:10.3389/fmicb.2020.578669)
Supplement: Supplementary file 1 [file Data_Sheet_1.xlsx]

## Sheet: Large Scale
#SampleID	Lattitude	Longitude	Altitude	Sampling Date	Location	NCBI official name
Feb10-r1-a	-70.0142	-20.9323	690.34	2017-02-10	SG1	SG-N-1
Feb10-r2-a	-70.0155	-20.9343	696.85	2017-02-10	SG1	SG-N-2
Feb10-r3-a	-70.0166	-20.936	699.25	2017-02-10	SG1	SG-N-3
Feb10-r4-a	-70.0174	-20.9386	698.67	2017-02-10	SG1	SG-N-4
Feb10-r5-a	-70.0191	-20.9435	698.71	2017-02-10	SG1	SG-N-5
Feb10-r6-a	-70.0192	-20.9495	702.93	2017-02-10	SG1	SG-N-6
Feb10-r7-a	-70.0197	-20.9505	702.5	2017-02-10	SG1	SG-N-7
Feb7-1	-70.02	-20.9532	678.81	2017-02-07	SG1	SG-N-8
Feb7-12	-70.0187	-20.9538	658.01	2017-02-07	SG1	SG-N-9
Feb7-15	-70.0184	-20.9539	654.32	2017-02-07	SG1	SG-N-10
Feb7-20	-70.0166	-20.9544	651.06	2017-02-07	SG1	SG-N-11
Feb7-3	-70.0196	-20.9533	680.95	2017-02-07	SG1	SG-N-12
Feb7-6	-70.0192	-20.9535	671.96	2017-02-07	SG1	SG-N-13
Feb7-9	-70.019	-20.9536	662.59	2017-02-07	SG1	SG-N-14
Feb8-12	-70.0127	-20.9309	655.79	2017-02-08	SG1	SG-N-15
Feb8-15	-70.0123	-20.9314	652.13	2017-02-08	SG1	SG-N-16
Feb8-19	-70.0112	-20.9326	651.24	2017-02-08	SG1	SG-N-17
Feb8-2	-70.0133	-20.9303	662.52	2017-02-08	SG1	SG-N-18
Feb8-23	-70.0095	-20.9345	648.06	2017-02-08	SG1	SG-N-19
Feb8-27	-70.0076	-20.9364	647.26	2017-02-08	SG1	SG-N-20
Feb8-32	-70.0064	-20.938	643.75	2017-02-08	SG1	SG-N-21
Feb8-33	-70.0064	-20.9382	644.27	2017-02-08	SG1	SG-N-22
Feb8-35	-70.0066	-20.9392	644.7	2017-02-08	SG1	SG-N-23
Feb8-37	-70.0069	-20.9413	644	2017-02-08	SG1	SG-N-24
Feb8-39	-70.0071	-20.9434	643.36	2017-02-08	SG1	SG-N-25
Feb8-41	-70.0073	-20.9455	641.97	2017-02-08	SG1	SG-N-26
Feb8-43	-70.0078	-20.9472	643.67	2017-02-08	SG1	SG-N-27
Feb8-45	-70.0081	-20.9485	645.02	2017-02-08	SG1	SG-N-28
Feb8-47	-70.0084	-20.9496	645.64	2017-02-08	SG1	SG-N-29
Feb8-49	-70.0086	-20.9506	646.46	2017-02-08	SG1	SG-N-30
Feb8-5	-70.0132	-20.9306	661.77	2017-02-08	SG1	SG-N-31
Feb8-51	-70.0089	-20.9521	646.79	2017-02-08	SG1	SG-N-32
Feb8-53	-70.0089	-20.9533	647.87	2017-02-08	SG1	SG-N-33
Feb8-55	-70.0089	-20.9545	647.05	2017-02-08	SG1	SG-N-34
Feb8-61	-70.0116	-20.9556	649.24	2017-02-08	SG1	SG-N-35
Feb8-65	-70.0141	-20.9552	646.94	2017-02-08	SG1	SG-N-36
Feb8-7	-70.0131	-20.9306	660.74	2017-02-08	SG1	SG-N-37
Feb8-9	-70.013	-20.9308	658.93	2017-02-08	SG1	SG-N-38
Feb9-1-a	-70.0046	-21.1529	687.69	2017-02-09	SG2	SG1-S-1
Feb9-1-b	-70.0046	-21.1529	687.69	2017-02-09	SG2	SG1-S-2
Feb9-2-a	-70.0067	-21.1528	686.93	2017-02-09	SG2	SG1-S-3
Feb9-2-b	-70.0067	-21.1528	686.93	2017-02-09	SG2	SG1-S-4
Feb9-3-a	-70.0087	-21.1528	684.22	2017-02-09	SG2	SG1-S-5
Feb9-3-b	-70.0087	-21.1528	684.22	2017-02-09	SG2	SG1-S-6
Feb9-4-11	-70.0099	-21.1507	682.52	2017-02-09	SG2	SG1-S-7
Feb9-4-14	-70.0097	-21.1504	685.12	2017-02-09	SG2	SG1-S-8
Feb9-4-17	-70.0096	-21.1501	687.21	2017-02-09	SG2	SG1-S-9
Feb9-4-2	-70.0105	-21.1523	680.46	2017-02-09	SG2	SG1-S-10
Feb9-4-20	-70.0095	-21.1498	690.27	2017-02-09	SG2	SG1-S-11
Feb9-4-22	-70.0094	-21.1496	692.7	2017-02-09	SG2	SG1-S-12
Feb9-4-24	-70.0093	-21.1494	697.5	2017-02-09	SG2	SG1-S-13
Feb9-4-26	-70.0092	-21.1491	698.83	2017-02-09	SG2	SG1-S-14
Feb9-4-28	-70.0091	-21.1489	702.99	2017-02-09	SG2	SG1-S-15
Feb9-4-30-a	-70.0089	-21.1485	705.66	2017-02-09	SG2	SG1-S-16
Feb9-4-4	-70.0104	-21.1519	679.95	2017-02-09	SG2	SG1-S-17
Feb9-4-6	-70.0103	-21.1515	679.36	2017-02-09	SG2	SG1-S-18
Feb9-4-8	-70.0102	-21.1511	680.43	2017-02-09	SG2	SG1-S-19
Feb9-4-a	-70.0106	-21.1528	683.28	2017-02-09	SG2	SG1-S-20
Feb9-4-b	-70.0106	-21.1528	683.28	2017-02-09	SG2	SG1-S-21
Feb9-5-a	-70.0126	-21.1528	655.83	2017-02-09	SG2	SG1-S-22
Feb9-5-b	-70.0126	-21.1528	655.83	2017-02-09	SG2	SG1-S-23
Feb9-6-a	-70.0148	-21.1529	653.19	2017-02-09	SG2	SG1-S-24
Feb9-6-b	-70.0148	-21.1529	653.19	2017-02-09	SG2	SG1-S-25
Feb9-7-a	-70.0168	-21.1528	650.08	2017-02-09	SG2	SG1-S-26
Feb9-7-b	-70.0168	-21.1528	650.08	2017-02-09	SG2	SG1-S-27
Feb9-8-a	-70.0189	-21.1528	650.34	2017-02-09	SG2	SG1-S-28
Feb9-8-b	-70.0189	-21.1528	650.34	2017-02-09	SG2	SG1-S-29
SG1-E-mid	-70.0089	-20.9564	646	2017-02-09	SG1	SG1-S-30

## Sheet: Medium Scale
#SampleID	Site	Sampling Date	Location	Altitude	Lattitude	Longitude	NCBI official name
SG1-BOT-2016-02-8-1	SG1	2016-02-02	Bottom	650	-70.0166	-20.9544	SG1-N-Bottom-1
SG1-BOT-2016-02-8-2	SG1	2016-02-02	Bottom	650	-70.0166	-20.9544	SG1-N-Bottom-2
SG1-BOT-2016-02-8-3	SG1	2016-02-02	Bottom	650	-70.0166	-20.9544	SG1-N-Bottom-3
SG1-BOT-2016-02-9-1	SG1	2016-02-02	Bottom	650	-70.0166	-20.9544	SG1-N-Bottom-4
SG1-BOT-2016-02-9-2	SG1	2016-02-02	Bottom	650	-70.0166	-20.9544	SG1-N-Bottom-5
SG1-BOT-2016-02-9-3	SG1	2016-02-02	Bottom	650	-70.0166	-20.9544	SG1-N-Bottom-6
SG1-BOT-2016-02mt-1	SG1	2016-02-02	Bottom	650	-70.0166	-20.9544	SG1-N-Bottom-7
SG1-TOP-2016-02mt-1-2	SG1	2016-02-02	Top	678	-70.02	-20.9532	SG1-N-Top-1
SG1-TOP-2016-02mt-10-1	SG1	2016-02-02	Top	678	-70.02	-20.9532	SG1-N-Top-2
SG1-TOP-2016-02mt-13a	SG1	2016-02-02	Top	678	-70.02	-20.9532	SG1-N-Top-3
SG1-TOP-2016-02mt-13b	SG1	2016-02-02	Top	678	-70.02	-20.9532	SG1-N-Top-4
SG1-TOP-2016-02mt-17a	SG1	2016-02-02	Top	678	-70.02	-20.9532	SG1-N-Top-5
SG1-TOP-2016-02mt-17b	SG1	2016-02-02	Top	678	-70.02	-20.9532	SG1-N-Top-6
SG1-TOP-2016-02mt-1a	SG1	2016-02-02	Top	678	-70.02	-20.9532	SG1-N-Top-7
SG1-TOP-2016-02mt-1b	SG1	2016-02-02	Top	678	-70.02	-20.9532	SG1-N-Top-8
SG1-TOP-2016-02mt-2-2	SG1	2016-02-02	Top	678	-70.02	-20.9532	SG1-N-Top-9
SG1-TOP-2016-02mt-3-1	SG1	2016-02-02	Top	678	-70.02	-20.9532	SG1-N-Top-10
SG1-TOP-2016-02mt-9b	SG1	2016-02-02	Top	678	-70.02	-20.9532	SG1-N-Top-11

## Sheet: Small Scale
#SampleID	Rock ID	Slice ID	Position	Altitude	Lattitude	Longitude	Site	Sampling Date	Distance to top (cm)	Distance to bottom (cm)	Distance to surface (cm)	NCBI official name
H2-A-B	Halite1	Halite1-A	Bottom	678	-70.02	-20.9532	SG1-Top	2018-02-20	6.3	1.9	1.9	SG1-N-Top-1-A-Bot
H2-A-M	Halite1	Halite1-A	Middle	678	-70.02	-20.9532	SG1-Top	2018-02-20	4.2	4	4	SG1-N-Top-1-A-Mid
H2-A-T	Halite1	Halite1-A	Top	678	-70.02	-20.9532	SG1-Top	2018-02-20	1.3	6.9	1.3	SG1-N-Top-1-A-Top
H2-B-B	Halite1	Halite1-B	Bottom	678	-70.02	-20.9532	SG1-Top	2018-02-20	6.6	2.4	2.4	SG1-N-Top-1-B-Bot
H2-B-M	Halite1	Halite1-B	Middle	678	-70.02	-20.9532	SG1-Top	2018-02-20	4.3	4.7	4.3	SG1-N-Top-1-B-Mid
H2-B-T	Halite1	Halite1-B	Top	678	-70.02	-20.9532	SG1-Top	2018-02-20	1.5	7.5	1.5	SG1-N-Top-1-B-Top
H2-C-B	Halite1	Halite1-C	Bottom	678	-70.02	-20.9532	SG1-Top	2018-02-20	5.1	1.2	1.2	SG1-N-Top-1-C-Bot
H2-C-M	Halite1	Halite1-C	Middle	678	-70.02	-20.9532	SG1-Top	2018-02-20	3.2	3.1	3.1	SG1-N-Top-1-C-Mid
H2-C-T	Halite1	Halite1-C	Top	678	-70.02	-20.9532	SG1-Top	2018-02-20	1	5.3	1	SG1-N-Top-1-C-Top
H3-A-B	Halite2	Halite2-A	Bottom	678	-70.02	-20.9532	SG1-Top	2018-02-20	6.8	1.4	1.4	SG1-N-Top-2-A-Bot
H3-A-M	Halite2	Halite2-A	Middle	678	-70.02	-20.9532	SG1-Top	2018-02-20	4.2	4	4	SG1-N-Top-2-A-Mid
H3-A-T	Halite2	Halite2-A	Top	678	-70.02	-20.9532	SG1-Top	2018-02-20	1.6	6.6	1.6	SG1-N-Top-2-A-Top
H3-B-B	Halite2	Halite2-B	Bottom	678	-70.02	-20.9532	SG1-Top	2018-02-20	4.9	1.3	1.3	SG1-N-Top-2-B-Bot
H3-B-M	Halite2	Halite2-B	Middle	678	-70.02	-20.9532	SG1-Top	2018-02-20	3.4	2.8	2.8	SG1-N-Top-2-B-Mid
H3-B-T	Halite2	Halite2-B	Top	678	-70.02	-20.9532	SG1-Top	2018-02-20	1.6	4.6	1.6	SG1-N-Top-2-B-Top
H3-C-B	Halite2	Halite2-C	Bottom	678	-70.02	-20.9532	SG1-Top	2018-02-20	4.4	1.3	1.3	SG1-N-Top-2-C-Bot
H3-C-M	Halite2	Halite2-C	Middle	678	-70.02	-20.9532	SG1-Top	2018-02-20	2.5	3.2	2.5	SG1-N-Top-2-C-Mid
H3-C-T	Halite2	Halite2-C	Top	678	-70.02	-20.9532	SG1-Top	2018-02-20	0.9	4.8	0.9	SG1-N-Top-2-C-Top
H4-A-B	Halite3	Halite3-A	Bottom	678	-70.02	-20.9532	SG1-Top	2018-02-20	3.8	1.3	1.3	SG1-N-Top-3-A-Bot
H4-A-M	Halite3	Halite3-A	Middle	678	-70.02	-20.9532	SG1-Top	2018-02-20	2.2	2.9	2.2	SG1-N-Top-3-A-Mid
H4-A-T	Halite3	Halite3-A	Top	678	-70.02	-20.9532	SG1-Top	2018-02-20	0.7	4.4	0.7	SG1-N-Top-3-A-Top
H4-B-B	Halite3	Halite3-B	Bottom	678	-70.02	-20.9532	SG1-Top	2018-02-20	5.3	1.8	1.8	SG1-N-Top-3-B-Bot
H4-B-M	Halite3	Halite3-B	Middle	678	-70.02	-20.9532	SG1-Top	2018-02-20	3.2	3.9	3.2	SG1-N-Top-3-B-Mid
H4-B-T	Halite3	Halite3-B	Top	678	-70.02	-20.9532	SG1-Top	2018-02-20	1.3	5.8	1.3	SG1-N-Top-3-B-Top
H4-C-B	Halite3	Halite3-C	Bottom	678	-70.02	-20.9532	SG1-Top	2018-02-20	5.3	1.5	1.5	SG1-N-Top-3-C-Bot
H4-C-M	Halite3	Halite3-C	Middle	678	-70.02	-20.9532	SG1-Top	2018-02-20	3.1	3.7	3.1	SG1-N-Top-3-C-Mid
H4-C-T	Halite3	Halite3-C	Top	678	-70.02	-20.9532	SG1-Top	2018-02-20	1.1	5.7	1.1	SG1-N-Top-3-C-Top
H5-A-M	Halite4	Halite4-A	Middle	678	-70.02	-20.9532	SG1-Top	2018-02-20	4.3	4.1	4.1	SG1-N-Top-4-A-Mid
H5-B-B	Halite4	Halite4-B	Bottom	678	-70.02	-20.9532	SG1-Top	2018-02-20	6.4	1.8	1.8	SG1-N-Top-4-B-Bot
H5-B-M	Halite4	Halite4-B	Middle	678	-70.02	-20.9532	SG1-Top	2018-02-20	4.1	4.1	4.1	SG1-N-Top-4-B-Mid
H5-B-T	Halite4	Halite4-B	Top	678	-70.02	-20.9532	SG1-Top	2018-02-20	1.5	6.7	1.5	SG1-N-Top-4-B-Top
H5-C-B	Halite4	Halite4-C	Bottom	678	-70.02	-20.9532	SG1-Top	2018-02-20	4.5	1.4	1.4	SG1-N-Top-4-C-Bot
H5-C-T	Halite4	Halite4-C	Top	678	-70.02	-20.9532	SG1-Top	2018-02-20	0.9	5	0.9	SG1-N-Top-4-C-Top
H6-A-B	Halite5	Halite5-A	Bottom	678	-70.02	-20.9532	SG1-Top	2018-02-20	5.6	2.3	2.3	SG1-N-Top-5-A-Bot
H6-A-M	Halite5	Halite5-A	Middle	678	-70.02	-20.9532	SG1-Top	2018-02-20	3.7	4.2	3.7	SG1-N-Top-5-A-Mid
H6-A-T	Halite5	Halite5-A	Top	678	-70.02	-20.9532	SG1-Top	2018-02-20	1.2	6.7	1.2	SG1-N-Top-5-A-Top
H6-B-B	Halite5	Halite5-B	Bottom	678	-70.02	-20.9532	SG1-Top	2018-02-20	6.1	1.9	1.9	SG1-N-Top-5-B-Bot
H6-B-M	Halite5	Halite5-B	Middle	678	-70.02	-20.9532	SG1-Top	2018-02-20	4.2	3.8	3.8	SG1-N-Top-5-B-Mid
H6-C-B	Halite5	Halite5-C	Bottom	678	-70.02	-20.9532	SG1-Top	2018-02-20	7.3	1.3	1.3	SG1-N-Top-5-C-Bot
H6-C-M	Halite5	Halite5-C	Middle	678	-70.02	-20.9532	SG1-Top	2018-02-20	4.4	4.2	4.2	SG1-N-Top-5-C-Mid
H6-C-T	Halite5	Halite5-C	Top	678	-70.02	-20.9532	SG1-Top	2018-02-20	2	6.6	2	SG1-N-Top-5-C-Top
H7-B-B	Halite6	Halite6-B	Bottom	678	-70.02	-20.9532	SG1-Top	2018-02-20	7.5	2.5	2.5	SG1-N-Top-6-B-Bot
H7-B-M	Halite6	Halite6-B	Middle	678	-70.02	-20.9532	SG1-Top	2018-02-20	4.6	5.4	4.6	SG1-N-Top-6-B-Mid
H7-B-T	Halite6	Halite6-B	Top	678	-70.02	-20.9532	SG1-Top	2018-02-20	2	8	2	SG1-N-Top-6-B-Top
H7-C-M	Halite6	Halite6-C	Middle	678	-70.02	-20.9532	SG1-Top	2018-02-20	5.5	5	5	SG1-N-Top-6-C-Mid
H7-C-T	Halite6	Halite6-C	Top	678	-70.02	-20.9532	SG1-Top	2018-02-20	2.5	8	2.5	SG1-N-Top-6-C-Top
